# Supplementary material for: Initial Learning Curve for Robot-Assisted Total Knee Arthroplasty in a Dedicated Orthopedics Center
Source: MDPI journal article supplement (doi:10.3390/jcm12216950), 2023-11-06
Supplement: s1 [file s1]

**Table S1.** Cohen's d effect sizes for baseline parameters comparison between RA-TKA and manual TKA in the patient group.

| Parameter                 | Cohen's d effect size |
|---------------------------|-----------------------|
| Age (years)               | 0.293                 |
| BMI (kg/m <sup>2</sup> )  | 0.157                 |
| Pre-operative varus (HKA) | 0.012                 |

TKA = Total Knee Arthroplasty; RA-TKA = Robotic-Assisted Total Knee Arthroplasty; BMI=Body mass index; HKA=Hip-knee-ankle.

**Table S2.** Cohen's d effect sizes for pairwise comparison of parameters between RA-TKA subgroups and manual TKA patients.

| Parameter                 | Learning vs<br>proficiency phase | Learning phase vs<br>manual TKA | Proficiency phase vs<br>manual TKA |
|---------------------------|----------------------------------|---------------------------------|------------------------------------|
| Age (years)               | 0.251                            | 0.008                           | 0.226                              |
| BMI (kg/m <sup>2</sup> )  | 0.214                            | 0.455                           | 0.113                              |
| Pre-operative varus (HKA) | 0.206                            | 0.150                           | 0.353                              |
| Operative time (minutes)  | 1.269                            | 1.646                           | 0.324                              |

TKA = Total Knee Arthroplasty; RA-TKA = Robotic-Assisted Total Knee Arthroplasty; BMI=Body mass index; HKA=Hip-knee-ankle.
